# Supplementary material for: Altered adrenal and gonadal steroids biosynthesis in patients with burn injury
Source: PubMed Central journal article supplement (PMC11324613; doi:10.1016/j.clinms.2016.10.002), 2016-10-26

**Fig S1**

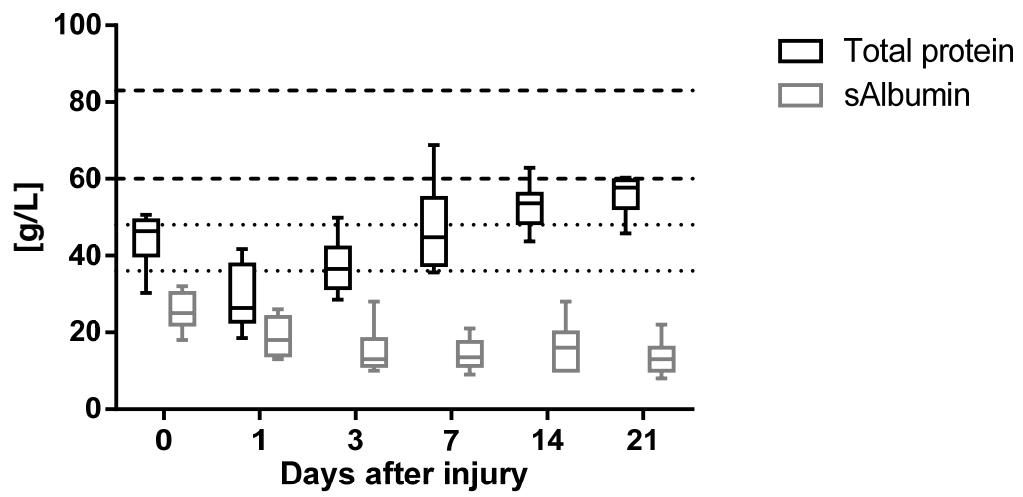

**Fig S2**

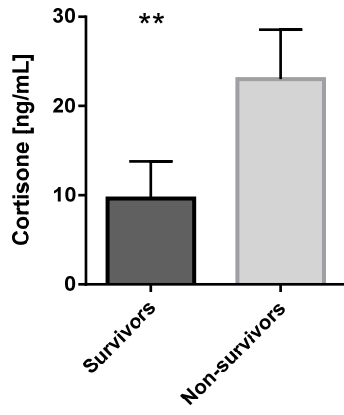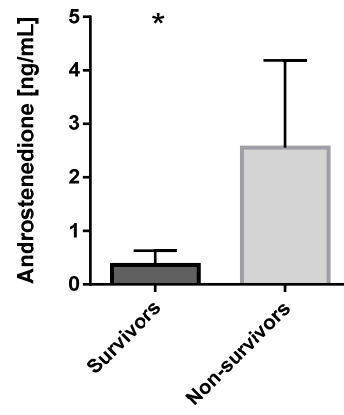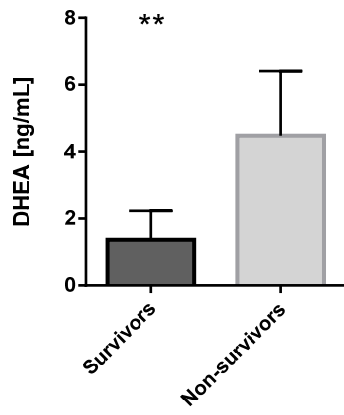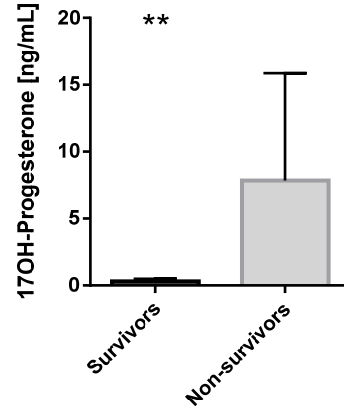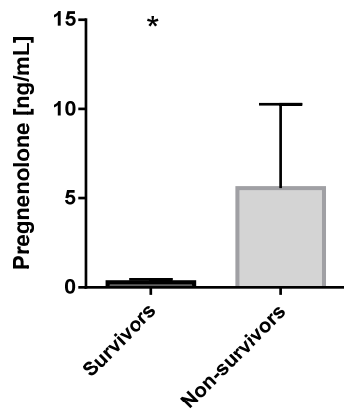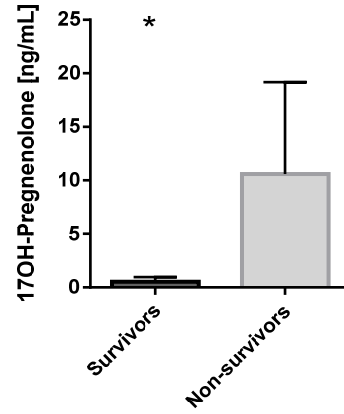

**Fig S3**

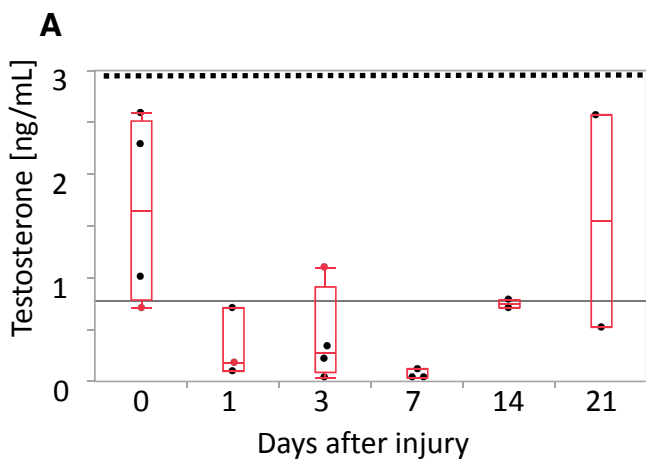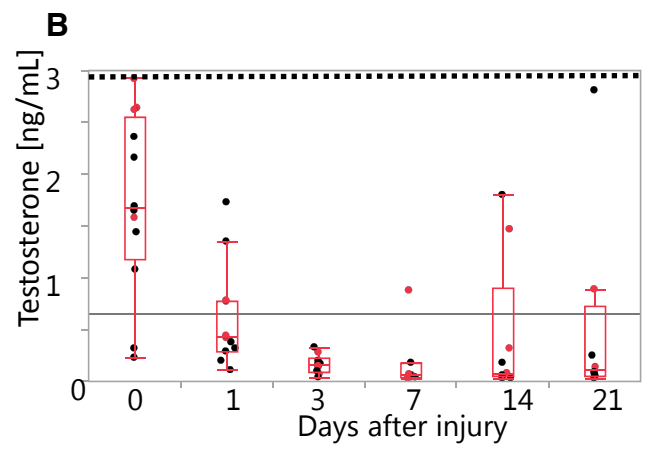

Supplement: mmc1.pdf [file mmc1.pdf]
